# Supplementary material
Source: PubMed Central journal article supplement (PMC4561693)
Supplement: AEM.01752-15_zam999116611so1.pdf [file AEM.01752-15_zam999116611so1.pdf]

1 TABLE S1. Upregulated genes in H7858 grown on CCS as compared to it grown in MBHIB at 7°C

| H7858 gene name | Gene product                                                                  | FC <sup>a</sup> |
|-----------------|-------------------------------------------------------------------------------|-----------------|
| LMOh7858_0048   | Putrescine carbamoyltransferase (EC 2.1.3.6)                                  | 31.36           |
| LMOh7858_0049   | Agmatine/putrescine antiporter, associated with agmatine catabolism           | 19.56           |
| LMOh7858_0050   | Agmatine deiminase (EC 3.5.3.12)                                              | 13.67           |
| LMOh7858_0051   | Carbamate kinase (EC 2.7.2.2)                                                 | 18.29           |
| LMOh7858_0176   | Zinc ABC transporter, periplasmic-binding protein ZnuA                        | 7.64            |
| LMOh7858_0221   | Phosphatidylinositol-specific phospholipase C (EC 4.6.1.13)                   | 2.83            |
| LMOh7858_0222   | Thiol-activated cytolysin                                                     | 2.54            |
| LMOh7858_0224   | Actin-assembly inducing protein ActA precursor                                | 2.86            |
| LMOh7858_0225   | Broad-substrate range phospholipase C (EC 3.1.4.3)                            | 3.19            |
| LMOh7858_0311   | Multiple sugar ABC transporter, ATP-binding protein                           | 2.54            |
| LMOh7858_0382   | Transketolase (EC 2.2.1.1)                                                    | 3.39            |
| LMOh7858_0383   | Transaldolase (EC 2.2.1.2)                                                    | 3.98            |
| LMOh7858_0384   | oxidoreductase, short-chain dehydrogenase/reductase family                    | 3.69            |
| LMOh7858_0385   | Ribose 5-phosphate isomerase B (EC 5.3.1.6)                                   | 5.86            |
| LMOh7858_0396   | Fumarate reductase flavoprotein subunit (EC 1.3.99.1)                         | 6.38            |
| LMOh7858_0499   | Internalin B (GW modules)                                                     | 2.71            |
| LMOh7858_0536   | antigen, putative                                                             | 17.50           |
| LMOh7858_0755   | Flagellin protein FlaA                                                        | 3.43            |
| LMOh7858_0840   | FMN-dependent NADH-azoreductase                                               | 2.73            |
| LMOh7858_0957   | Sulfate permease                                                              | 3.95            |
| LMOh7858_1214   | Cob(III)alamin reductase                                                      | 3.81            |
| LMOh7858_1215   | Propanediol utilization polyhedral body protein PduT                          | 3.72            |
| LMOh7858_1216   | Propanediol utilization polyhedral body protein PduU                          | 4.48            |
| LMOh7858_1217   | Propanediol utilization protein PduV                                          | 6.57            |
| LMOh7858_1217.1 | Predicted alpha-ribazole-5-phosphate synthase CblS for cobalamin biosynthesis | 6.36            |
| LMOh7858_1219   | Adenosylcobinamide-phosphate guanylyltransferase (EC 2.7.7.62)                | 5.02            |
| LMOh7858_1220   | Cobalamin synthase                                                            | 6.08            |
| LMOh7858_1221   | Alpha-ribazole-5'-phosphate phosphatase (EC 3.1.3.73)                         | 6.78            |
| LMOh7858_1242   | L-threonine 3-O-phosphate decarboxylase (EC 4.1.1.81)                         | 2.77            |

|                 |                                                                              |       |
|-----------------|------------------------------------------------------------------------------|-------|
| LMOh7858_1243   | Threonine kinase in B12 biosynthesis                                         | 2.88  |
| LMOh7858_1245   | Alcohol dehydrogenase (EC 1.1.1.1)                                           | 4.97  |
| LMOh7858_1249   | Ethanolamine ammonia-lyase heavy chain (EC 4.3.1.7)                          | 4.97  |
| LMOh7858_1250   | Ethanolamine ammonia-lyase light chain (EC 4.3.1.7)                          | 5.50  |
| LMOh7858_1253   | Acetaldehyde dehydrogenase, ethanolamine utilization cluster                 | 5.26  |
| LMOh7858_1254   | Ethanolamine utilization protein similar to PduA/PduJ                        | 5.56  |
| LMOh7858_1254.2 | Ethanolamine utilization protein similar to PduL                             | 5.89  |
| LMOh7858_1258.1 | Ethanolamine utilization protein similar to PduT                             | 6.19  |
| LMOh7858_1260   | Ethanolamine permease                                                        | 5.90  |
| LMOh7858_1262.1 | Substrate-specific component CblT of predicted B12-regulated ECF transporter | 8.33  |
| LMOh7858_1264   | Cobyrinic acid A,C-diamide synthase                                          | 10.02 |
| LMOh7858_1265   | Adenosylcobinamide-phosphate synthase                                        | 12.88 |
| LMOh7858_1266   | Cobalt-precorrin-8x methylmutase (EC 5.4.1.2)                                | 11.84 |
| LMOh7858_1267   | Cobalt-precorrin-6 synthase, anaerobic                                       | 11.27 |
| LMOh7858_1268   | Cobalt-precorrin-6y C5-methyltransferase (EC 2.1.1.-)                        | 12.39 |
| LMOh7858_1269   | Cobalt-precorrin-6y C15-methyltransferase [decarboxylating] (EC 2.1.1.-)     | 11.32 |
| LMOh7858_1270   | Cobalt-precorrin-4 C11-methyltransferase (EC 2.1.1.133)                      | 9.70  |
| LMOh7858_1271   | Cobalamin biosynthesis protein CbiG                                          | 11.54 |
| LMOh7858_1272   | Cobalt-precorrin-3b C17-methyltransferase                                    | 10.29 |
| LMOh7858_1273   | Cobalt-precorrin-6x reductase (EC 1.3.1.54)                                  | 10.85 |
| LMOh7858_1274   | Uroporphyrinogen-III methyltransferase (EC 2.1.1.107)                        | 12.55 |
| LMOh7858_1275   | Sirohydrochlorin cobaltochelataase CbiK (EC 4.99.1.3)                        | 10.40 |
| LMOh7858_1276   | Cobalt-precorrin-2 C20-methyltransferase (EC 2.1.1.130)                      | 11.76 |
| LMOh7858_1277   | Substrate-specific component CbiM of cobalt ECF transporter                  | 9.95  |
| LMOh7858_1278   | Additional substrate-specific component CbiN of cobalt ECF transporter       | 9.02  |
| LMOh7858_1279   | Transmembrane component CbiQ of energizing module of cobalt ECF transporter  | 7.54  |
| LMOh7858_1280   | ATPase component CbiO of energizing module of cobalt ECF transporter         | 5.30  |
| LMOh7858_1281   | Cobyrinic acid synthase                                                      | 2.94  |
| LMOh7858_1282   | Cob(I)alamin adenosyltransferase PduO (EC 2.5.1.17)                          | 2.66  |
| LMOh7858_1329.1 | FIG00774262: hypothetical protein                                            | 7.76  |

|                 |                                                                             |       |
|-----------------|-----------------------------------------------------------------------------|-------|
| LMOh7858_1331   | transporter                                                                 | 8.12  |
| LMOh7858_2119   | PTS system, mannose-specific IIA component (EC 2.7.1.69)                    | 6.31  |
| LMOh7858_2119.1 | Putative glucosamine-fructose-6-phosphate aminotransferase                  | 3.42  |
| LMOh7858_2121   | putative glucosamine-fructose-6-phosphate aminotransferase                  | 3.99  |
| LMOh7858_2122   | PTS system, mannose-specific IID component (EC 2.7.1.69)                    | 5.61  |
| LMOh7858_2123   | PTS system, mannose-specific IIC component (EC 2.7.1.69)                    | 4.78  |
| LMOh7858_2124   | PTS system, mannose-specific IIB component (EC 2.7.1.69)                    | 4.71  |
| LMOh7858_2253   | Maltose phosphorylase (EC 2.4.1.8)                                          | 3.45  |
| LMOh7858_2253.1 | Maltodextrose utilization protein MalA                                      | 5.71  |
| LMOh7858_2255   | Maltose/maltodextrin ABC transporter, permease protein MalG                 | 6.32  |
| LMOh7858_2256   | Maltose/maltodextrin ABC transporter, permease protein MalF                 | 7.96  |
| LMOh7858_2257   | Maltose/maltodextrin ABC transporter, substrate binding periplasmic protein | 5.74  |
| LMOh7858_2292.2 | FIG00774368: hypothetical protein                                           | 5.05  |
| LMOh7858_2292.3 | Inosose dehydratase (EC 4.2.1.44)                                           | 4.27  |
| LMOh7858_2426.4 | FIG00775213: hypothetical protein                                           | 2.85  |
| LMOh7858_2503   | FIG00774521: hypothetical protein                                           | 4.96  |
| LMOh7858_2504   | Rrf2 family transcriptional regulator                                       | 4.24  |
| LMOh7858_2903   | serine/threonine protein phosphatase family protein                         | 2.78  |
| LMOh7858_2922   | Transketolase (EC 2.2.1.1)                                                  | 4.77  |
| LMOh7858_2925   | Galactitol-1-phosphate 5-dehydrogenase (EC 1.1.1.251)                       | 7.62  |
| LMOh7858_2926   | Galactitol-1-phosphate 5-dehydrogenase (EC 1.1.1.251)                       | 5.48  |
| LMOh7858_2927   | PTS system, galactitol-specific IIC component (EC 2.7.1.69)                 | 4.38  |
| LMOh7858_2928   | PTS system, galactitol-specific IIB component (EC 2.7.1.69)                 | 3.17  |
| LMOh7858_2994   | Haloacid dehalogenase-like hydrolase                                        | 5.34  |
| LMOh7858_2995   | Transcription regulator, RpiR family                                        | 3.11  |
| LMOh7858_3062   | hydrolase, haloacid dehalogenase-like family                                | 7.97  |
| LMOh7858_3063   | PTS system, mannitol-specific IIB component (EC 2.7.1.69)                   | 19.28 |
| LMOh7858_3064   | oxidoreductase, Gfo/Idh/MocA family                                         | 9.36  |
| LMOh7858_3065   | N-acetylmannosamine-6-phosphate 2-epimerase (EC 5.1.3.9)                    | 13.04 |

2  
3 <sup>a</sup>FC, fold change. FC= average normalized RNA-seq coverage (NRC) (CCS) ÷ average NRC (MBHIB)

4 TABLE S2. Down regulated genes H7858 grown on CCS as compared to it grown in MBHIB at 7°C

| H7858 Gene Name | Gene Product                                                                                                                               | FC <sup>a</sup> |
|-----------------|--------------------------------------------------------------------------------------------------------------------------------------------|-----------------|
| LMOh7858_0107   | oxidoreductase, aldo/keto reductase family<br>Oligopeptide ABC transporter, periplasmic oligopeptide-binding protein                       | 0.37            |
| LMOh7858_0175   | O                                                                                                                                          | 0.38            |
| LMOh7858_0246   | Dihydropteroate synthase (EC 2.5.1.15)                                                                                                     | 0.16            |
| LMOh7858_0367   | Internalin-like protein (LPXTG motif) Lmo0331 homolog                                                                                      | 0.40            |
| LMOh7858_0506   | Cell division protein FtsI [Peptidoglycan synthetase] (EC 2.4.1.129)<br>Cell envelope-associated transcriptional attenuator LytR-CpsA-Psr, | 0.32            |
| LMOh7858_0508   | subfa                                                                                                                                      | 0.31            |
| LMOh7858_0625   | Imidazoleglycerol-phosphate dehydratase (EC 4.2.1.19)<br>O-acetylhomoserine sulphydrylase (EC 2.5.1.49) / O-succinylhomoserine             | 0.31            |
| LMOh7858_0655   | sulphydrylase                                                                                                                              | 0.37            |
| LMOh7858_0667   | Transcriptional regulator, MarR family                                                                                                     | 0.38            |
| LMOh7858_0852.2 | GTP pyrophosphokinase (EC 2.7.6.5)                                                                                                         | 0.32            |
| LMOh7858_0878   | acetyltransferase, GNAT family<br>Putative peptidoglycan bound protein (LPXTG motif) Lmo0880                                               | 0.36            |
| LMOh7858_0940   | homolog                                                                                                                                    | 0.30            |
| LMOh7858_1015.1 | FIG00774399: hypothetical protein                                                                                                          | 0.27            |
| LMOh7858_1015.2 | FIG00774456: hypothetical protein                                                                                                          | 0.39            |
| LMOh7858_1066.1 | FIG00774146: hypothetical protein                                                                                                          | 0.28            |
| LMOh7858_1202.1 | FIG00774448: hypothetical protein                                                                                                          | 0.00            |
| LMOh7858_1289   | N-acetylmuramoyl-L-alanine amidase, family 4                                                                                               | 0.39            |
| LMOh7858_1299   | Transcriptional regulator, MarR family                                                                                                     | 0.38            |
| LMOh7858_1308.2 | FIG00774960: hypothetical protein                                                                                                          | 0.24            |
| LMOh7858_1321.2 | DUF1801 domain-containing protein<br>PhnB protein; putative DNA binding 3-demethylubiquinone-9 3-                                          | 0.36            |
| LMOh7858_1321.3 | methyltransfer                                                                                                                             | 0.28            |
| LMOh7858_1339   | Trehalose-6-phosphate hydrolase (EC 3.2.1.93)<br>PTS system, trehalose-specific IIB component (EC 2.7.1.69) / PTS                          | 0.18            |
| LMOh7858_1340   | system,                                                                                                                                    | 0.19            |

|                 |                                                                     |      |
|-----------------|---------------------------------------------------------------------|------|
| LMOh7858_1511   | FIG00774487: hypothetical protein                                   | 0.30 |
| LMOh7858_1614   | Iron-sulfur cluster regulator IscR                                  | 0.38 |
| LMOh7858_1812.1 | Hypothetical protein SAV1869                                        | 0.38 |
| LMOh7858_1858   | Glutamate synthase [NADPH] small chain (EC 1.4.1.13)                | 0.30 |
| LMOh7858_1859   | Glutamate synthase [NADPH] large chain (EC 1.4.1.13)                | 0.29 |
| LMOh7858_1956   | Orotate phosphoribosyltransferase (EC 2.4.2.10)                     | 0.26 |
| LMOh7858_1957   | Orotidine 5'-phosphate decarboxylase (EC 4.1.1.23)                  | 0.27 |
| LMOh7858_1958   | Dihydroorotate dehydrogenase, catalytic subunit (EC 1.3.3.1)        | 0.29 |
| LMOh7858_1959   | Dihydroorotate dehydrogenase electron transfer subunit (EC 1.3.3.1) | 0.22 |
| LMOh7858_1960   | Carbamoyl-phosphate synthase large chain (EC 6.3.5.5)               | 0.21 |
| LMOh7858_1961   | Carbamoyl-phosphate synthase small chain (EC 6.3.5.5)               | 0.22 |
| LMOh7858_1965.1 | FIG00774989: hypothetical protein                                   | 0.37 |
| LMOh7858_1977   | Copper chaperone                                                    | 0.38 |
| LMOh7858_2167   | Cell division protein FtsL                                          | 0.37 |
| LMOh7858_2179   | Excinuclease ABC subunit A paralog of unknown function              | 0.38 |
| LMOh7858_2262.2 | FIG00774113: hypothetical protein                                   | 0.37 |
| LMOh7858_2337   | N-acetylmuramoyl-L-alanine amidase, family 4                        | 0.31 |
| LMOh7858_2343.1 | FIG00774091: hypothetical protein                                   | 0.18 |
| LMOh7858_2490   | L-Cystine ABC transporter, permease protein TcyM                    | 0.18 |
| LMOh7858_2491   | L-Cystine ABC transporter, permease protein TcyL                    | 0.12 |
| LMOh7858_2492   | L-Cystine ABC transporter, periplasmic cystine-binding protein TcyK | 0.31 |
| LMOh7858_2495   | HTH-type transcriptional regulator YtlI, LysR family                | 0.26 |
| LMOh7858_2521   | PTS system, IIB component                                           | 0.38 |
| LMOh7858_2566.1 | FIG00774101: hypothetical protein                                   | 0.23 |
| LMOh7858_2584.1 | FIG00774650: hypothetical protein                                   | 0.40 |
| LMOh7858_2635   | FIG00774998: hypothetical protein                                   | 0.25 |
| LMOh7858_2635.1 | Hypothetical protein, homolog of fig 393130.3.peg.2627              | 0.20 |
| LMOh7858_2717.1 | FIG00774295: hypothetical protein                                   | 0.13 |
| LMOh7858_2717.2 | FIG00774092: hypothetical protein                                   | 0.19 |
| LMOh7858_2752   | lipoprotein, putative                                               | 0.30 |
| LMOh7858_2951   | Mg(2+) transport ATPase, P-type (EC 3.6.3.2)                        | 0.27 |

|                 |                                                                                     |      |
|-----------------|-------------------------------------------------------------------------------------|------|
| LMOh7858_3026.1 | hypothetical protein                                                                | 0.31 |
|                 | Beta-glucosidase (EC 3.2.1.21); 6-phospho-beta-glucosidase (EC                      |      |
| LMOh7858_3027   | 3.2.1.86)                                                                           | 0.24 |
| LMOh7858_3028   | PTS system, cellobiose-specific IIB component (EC 2.7.1.69)                         | 0.12 |
| LMOh7858_3066.6 | hypothetical secreted protein                                                       | 0.30 |
| LMOh7858_3076   | D-alanyl-D-alanine carboxypeptidase (EC 3.4.16.4)                                   | 0.24 |
| LMOh7858_3082   | transporter                                                                         | 0.27 |
| LMOh7858_3083   | Catalyzes the cleavage of p-aminobenzoyl-glutamate to p-aminobenzoate and glutamate | 0.29 |

---

5  
6 <sup>a</sup>FC, fold change. FC= average normalized RNA-seq coverage (NRC) (CCS) ÷ average NRC (MBHIB)

7 TABLE S3. Genes involved in cobalamin biosynthesis upregulated in H7858 grown on CSS compared to in MBHIB at 7°C

| H7858           | Gene name in            |                     | H7858 gene product                                                            | FC <sup>b</sup> |
|-----------------|-------------------------|---------------------|-------------------------------------------------------------------------------|-----------------|
|                 | EGD-e <sup>a</sup>      | 10403S <sup>a</sup> |                                                                               |                 |
| LMOh7858_1214   | lmo1142                 | LMRG_00585          | Cob(III)alamin reductase                                                      | 3.81            |
| LMOh7858_1217.1 | lmo1146                 | LMRG_00589          | Predicted alpha-ribazole-5-phosphate synthase CblS for cobalamin biosynthesis | 6.36            |
| LMOh7858_1219   | lmo1147                 | LMRG_00590          | Adenosylcobinamide-phosphate guanylyltransferase (EC 2.7.7.62)                | 5.02            |
| LMOh7858_1220   | lmo1148 ( <i>cobS</i> ) | LMRG_00591          | Cobalamin synthase                                                            | 6.08            |
| LMOh7858_1221   | lmo1149                 | LMRG_00592          | Alpha-ribazole-5'-phosphate phosphatase (EC 3.1.3.73)                         | 6.78            |
| LMOh7858_1242   | lmo1169 ( <i>cobD</i> ) | LMRG_00612          | L-threonine 3-O-phosphate decarboxylase (EC 4.1.1.81)                         | 2.77            |
| LMOh7858_1262.1 | lmo1190                 | LMRG_00636          | Substrate-specific component CblT of predicted B12-regulated ECF transporter  | 8.33            |
| LMOh7858_1264   | lmo1191 ( <i>cobB</i> ) | LMRG_00637          | Cobyric acid A,C-diamide synthase                                             | 10.02           |
| LMOh7858_1265   | lmo1192 ( <i>cobD</i> ) | LMRG_00638          | Adenosylcobinamide-phosphate synthase                                         | 12.88           |
| LMOh7858_1266   | lmo1193                 | LMRG_00639          | Cobalt-precorrin-8x methylmutase (EC 5.4.1.2)                                 | 11.84           |
| LMOh7858_1267   | lmo1194 ( <i>cbiD</i> ) | LMRG_00640          | Cobalt-precorrin-6 synthase, anaerobic                                        | 11.27           |
| LMOh7858_1268   | lmo1195 ( <i>cbiE</i> ) | LMRG_00641          | Cobalt-precorrin-6y C5-methyltransferase (EC 2.1.1.-)                         | 12.39           |
| LMOh7858_1269   | lmo1196                 | LMRG_00642          | Cobalt-precorrin-6y C15-methyltransferase [decarboxylating] (EC 2.1.1.-)      | 11.32           |
| LMOh7858_1270   | lmo1197 ( <i>cbiF</i> ) | LMRG_00643          | Cobalt-precorrin-4 C11-methyltransferase (EC 2.1.1.133)                       | 9.70            |
| LMOh7858_1271   | lmo1198 ( <i>cbiG</i> ) | LMRG_00644          | Cobalamin biosynthesis protein CbiG                                           | 11.54           |
| LMOh7858_1272   | lmo1199 ( <i>cbiH</i> ) | LMRG_00645          | Cobalt-precorrin-3b C17-methyltransferase                                     | 10.29           |
| LMOh7858_1273   | lmo1200                 | LMRG_00646          | Cobalt-precorrin-6x reductase (EC 1.3.1.54)                                   | 10.85           |
| LMOh7858_1274   | lmo1201                 | LMRG_00647          | Uroporphyrinogen-III methyltransferase (EC 2.1.1.107) / Uroporphyrinogen      | 12.55           |
| LMOh7858_1275   | lmo1202 ( <i>cbiK</i> ) | LMRG_00648          | Sirohydrochlorin cobaltochelataase CbiK (EC 4.99.1.3)                         | 10.40           |
| LMOh7858_1276   | lmo1203 ( <i>cbiL</i> ) | LMRG_00649          | Cobalt-precorrin-2 C20-methyltransferase (EC 2.1.1.130)                       | 11.76           |
| LMOh7858_1277   | lmo1204                 | LMRG_00650          | Substrate-specific component CbiM of cobalt ECF transporter                   | 9.95            |
| LMOh7858_1278   | lmo1205                 | LMRG_00651          | Additional substrate-specific component CbiN of cobalt ECF transporter        | 9.02            |
| LMOh7858_1279   | lmo1206 ( <i>cbiQ</i> ) | LMRG_00652          | Transmembrane component CbiQ of energizing module of cobalt ECF transporter   | 7.54            |
| LMOh7858_1280   | lmo1207                 | LMRG_00653          | ATPase component CbiO of energizing module of cobalt ECF transporter          | 5.30            |
| LMOh7858_1281   | lmo1208 ( <i>cobQ</i> ) | LMRG_00654          | Cobyric acid synthase                                                         | 2.94            |

8

9 <sup>a</sup>Strain EGD-e (GenBank accession no.: [NC\\_003210](#)) and 10403S (GenBank accession no.: [NC\\_017544](#)) are *L. monocytogenes*;

10 <sup>b</sup>FC, fold change, FC = average NRC(CSS) ÷ average NRC(MBHIB); only genes with FDR < 0.05 are listed.

11 TABLE S4. Upregulated genes involved in ethanolamine and 1,2-propanediol utilization in H7858 grown on CSS compared to in  
 12 MBHIB at 7°C

|                             | Gene name in    |                                      |                     | H7858 gene product                                           | FC <sup>b</sup> |
|-----------------------------|-----------------|--------------------------------------|---------------------|--------------------------------------------------------------|-----------------|
|                             | H7858           | EGD-e <sup>a</sup>                   | 10403S <sup>a</sup> |                                                              |                 |
| Ethanolamine utilization    |                 |                                      |                     |                                                              |                 |
|                             | LMOh7858_1245   | lmo1171 ( <i>pduQ</i> ) <sup>c</sup> | LMRG_00617          | Alcohol dehydrogenase (EC 1.1.1.1)                           | 4.97            |
|                             | LMOh7858_1249   | lmo1175 ( <i>eutB</i> )              | LMRG_00621          | Ethanolamine ammonia-lyase heavy chain (EC 4.3.1.7)          | 4.97            |
|                             | LMOh7858_1250   | lmo1176 ( <i>eutC</i> )              | LMRG_00622          | Ethanolamine ammonia-lyase light chain (EC 4.3.1.7)          | 5.50            |
|                             | LMOh7858_1253   | lmo1179                              | LMRG_00625          | Acetaldehyde dehydrogenase, ethanolamine utilization cluster | 5.26            |
|                             | LMOh7858_1254   | lmo1180                              | LMRG_00626          | Ethanolamine utilization protein similar to PduA/PduJ        | 5.56            |
|                             | LMOh7858_1254.2 | lmo1182                              | LMRG_00628          | Ethanolamine utilization protein similar to PduL             | 5.89            |
|                             | LMOh7858_1258.1 | lmo1185                              | LMRG_00631          | Ethanolamine utilization protein similar to PduT             | 6.19            |
|                             | LMOh7858_1260   | lmo1186                              | LMRG_00632          | Ethanolamine permease                                        | 5.90            |
| 1,2-propanediol utilization |                 |                                      |                     |                                                              |                 |
|                             | LMOh7858_1214   | lmo1142                              | LMRG_00585          | Cob(III)alamin reductase                                     | 3.81            |
|                             | LMOh7858_1215   | lmo1143                              | LMRG_00586          | Propanediol utilization polyhedral body protein PduT         | 3.72            |
|                             | LMOh7858_1216   | lmo1144                              | LMRG_00587          | Propanediol utilization polyhedral body protein PduU         | 4.48            |
|                             | LMOh7858_1217   | lmo1145                              | LMRG_00588          | Propanediol utilization protein PduV                         | 6.57            |
|                             | LMOh7858_1243   | lmo1170                              | LMRG_00613          | Threonine kinase in B12 biosynthesis                         | 2.88            |
|                             | LMOh7858_1245   | lmo1171 ( <i>pduQ</i> ) <sup>c</sup> | LMRG_00617          | Alcohol dehydrogenase (EC 1.1.1.1)                           | 4.97            |
|                             | LMOh7858_1282   | lmo1209                              | LMRG_00655          | Cob(I)alamin adenosyltransferase PduO (EC 2.5.1.17)          | 2.66            |

13

14 <sup>a</sup>Strain EGD-e (GenBank accession no.: [NC\\_003210](https://www.ncbi.nlm.nih.gov/nuccore/NC_003210)) and 10403S (GenBank accession no.: [NC\\_017544](https://www.ncbi.nlm.nih.gov/nuccore/NC_017544)) are *L. monocytogenes*;

15 <sup>b</sup>FC, fold change, FC= average NRC(CSS) ÷ average NRC(MBHIB); only genes with FDR <0.05 are listed;

16 °As the gene product Alcohol dehydrogenase of the gene LMOh7858\_1245 may participate in both of the ethanolamine utilization and  
17 the 1,2-propanediol utilization pathways, this gene was listed under both categories.

18 TABLE S5. Upregulated genes involved in carbohydrate transport and utilization in H7858 grown on CSS compared to in MBHIB at  
 19 7°C

|                           | Gene name in            |                    |                                                                             | H7858 gene product | FC <sup>b</sup> |
|---------------------------|-------------------------|--------------------|-----------------------------------------------------------------------------|--------------------|-----------------|
|                           | H7858                   | EGD-e <sup>a</sup> | 10403S <sup>a</sup>                                                         |                    |                 |
| Mannose                   |                         |                    |                                                                             |                    |                 |
| LMOh7858_2119             | lmo1997                 | LMRG_01145         | PTS system, mannose-specific IIA component (EC 2.7.1.69)                    |                    | 6.31            |
| LMOh7858_2122             | lmo2000                 | LMRG_01148         | PTS system, mannose-specific IID component (EC 2.7.1.69)                    |                    | 5.61            |
| LMOh7858_2123             | lmo2001                 | LMRG_01149         | PTS system, mannose-specific IIC component (EC 2.7.1.69)                    |                    | 4.78            |
| LMOh7858_2124             | lmo2002                 | LMRG_01150         | PTS system, mannose-specific IIB component (EC 2.7.1.69)                    |                    | 4.71            |
| Galactitol                |                         |                    |                                                                             |                    |                 |
| LMOh7858_2925             | lmo2663                 | LMRG_02208         | Galactitol-1-phosphate 5-dehydrogenase (EC 1.1.1.251)                       |                    | 7.62            |
| LMOh7858_2926             | lmo2664                 | LMRG_02209         | Galactitol-1-phosphate 5-dehydrogenase (EC 1.1.1.251)                       |                    | 5.48            |
| LMOh7858_2927             | lmo2665                 | LMRG_02210         | PTS system, galactitol-specific IIC component (EC 2.7.1.69)                 |                    | 4.38            |
| LMOh7858_2928             | lmo2666                 | LMRG_02211         | PTS system, galactitol-specific IIB component (EC 2.7.1.69)                 |                    | 3.17            |
| Mannitol                  |                         |                    |                                                                             |                    |                 |
| LMOh7858_3063             | lmo2799                 | LMRG_01898         | PTS system, mannitol-specific IIB component (EC 2.7.1.69)                   |                    | 19.28           |
| Maltose                   |                         |                    |                                                                             |                    |                 |
| LMOh7858_2253             | lmo2121                 | LMRG_01275         | Maltose phosphorylase (EC 2.4.1.8)                                          |                    | 3.45            |
| LMOh7858_2253.1           | lmo2122                 | LMRG_01276         | Maltodextrose utilization protein MalA                                      |                    | 5.71            |
| LMOh7858_2255             | lmo2123                 | LMRG_01277         | Maltose/maltodextrin ABC transporter, permease protein MalG                 |                    | 6.32            |
| LMOh7858_2256             | lmo2124                 | LMRG_01278         | Maltose/maltodextrin ABC transporter, permease protein MalF                 |                    | 7.96            |
| LMOh7858_2257             | lmo2125                 | LMRG_01279         | Maltose/maltodextrin ABC transporter, substrate binding periplasmic protein |                    | 5.74            |
| Pentose phosphate pathway |                         |                    |                                                                             |                    |                 |
| LMOh7858_2922             | lmo2660                 | LMRG_02205         | Transketolase (EC 2.2.1.1)                                                  |                    | 4.77            |
| LMOh7858_0382             | lmo0342                 | LMRG_00033         | Transketolase (EC 2.2.1.1)                                                  |                    | 3.39            |
| LMOh7858_0383             | lmo0343 ( <i>tal2</i> ) | LMRG_00034         | Transaldolase (EC 2.2.1.2)                                                  |                    | 3.98            |
| LMOh7858_0384             | lmo0344                 | LMRG_00035         | oxidoreductase, short-chain dehydrogenase/reductase family                  |                    | 3.69            |
| LMOh7858_0385             | lmo0345                 | LMRG_00036         | Ribose 5-phosphate isomerase B (EC 5.3.1.6)                                 |                    | 5.86            |

20 <sup>a</sup>Strain EGD-e (GenBank accession no.: [NC\\_003210](https://ncbi.nlm.nih.gov/nuccore/NC_003210)) and 10403S (GenBank accession no.: [NC\\_017544](https://ncbi.nlm.nih.gov/nuccore/NC_017544)) are *L. monocytogenes*;

21 <sup>b</sup>FC, fold change, FC= average NRC(CSS) ÷ average NRC(MBHIB); only genes with FDR <0.05 are listed.

22 TABLE S6. Upregulated genes involved in agmatine deiminase in H7858 grown on CSS compared to in MBHIB at 7°C

| Gene name in  |                          |                            | H7858 gene product                                                  | FC <sup>b</sup> |
|---------------|--------------------------|----------------------------|---------------------------------------------------------------------|-----------------|
| H7858         | EGD-e <sup>a</sup>       | 10403S <sup>a</sup>        |                                                                     |                 |
| LMOh7858_0048 | lmo0036 ( <i>arcB</i> )  | LMRG_02465 ( <i>arcB</i> ) | Putrescine carbamoyltransferase (EC 2.1.3.6)                        | 31.36           |
| LMOh7858_0049 | lmo0037                  | LMRG_02466                 | Agmatine/putrescine antiporter, associated with agmatine catabolism | 19.56           |
| LMOh7858_0050 | lmo0038 ( <i>aguAI</i> ) | LMRG_02467                 | Agmatine deiminase (EC 3.5.3.12)                                    | 13.67           |
| LMOh7858_0051 | lmo0039                  | LMRG_02468                 | Carbamate kinase (EC 2.7.2.2)                                       | 18.29           |

23

24 <sup>a</sup>Strain EGD-e (GenBank accession no.: [NC\\_003210](#)) and 10403S (GenBank accession no.: [NC\\_017544](#)) are *L. monocytogenes*;

25 <sup>b</sup>FC, fold change, FC= average NRC(CSS) ÷ average NRC(MBHIB); only genes with FDR <0.05 are listed.

26 TABLE S7. Upregulated genes that are regulated by PrfA in H7858 grown on CSS compared to in MBHIB at 7°C

| H7858         | Gene name in            |                     | H7858 gene product                                          | FC <sup>b</sup> |
|---------------|-------------------------|---------------------|-------------------------------------------------------------|-----------------|
|               | EGD-e <sup>a</sup>      | 10403S <sup>a</sup> |                                                             |                 |
| LMOh7858_0499 | lmo0434 ( <i>inlB</i> ) | LMRG_00127          | Internalin B (GW modules)                                   | 2.71            |
| LMOh7858_0221 | lmo0201 ( <i>plcA</i> ) | LMRG_02623          | Phosphatidylinositol-specific phospholipase C (EC 4.6.1.13) | 2.83            |
| LMOh7858_0222 | lmo0202 ( <i>hly</i> )  | LMRG_02624          | Thiol-activated cytolysin                                   | 2.54            |
| LMOh7858_0224 | lmo0204 ( <i>actA</i> ) | LMRG_02626          | Actin-assembly inducing protein ActA precursor              | 2.86            |
| LMOh7858_0225 | lmo0205 ( <i>plcB</i> ) | LMRG_02627          | Broad-substrate range phospholipase C (EC 3.1.4.3)          | 3.19            |

27

28 <sup>a</sup>Strain EGD-e (GenBank accession no.: [NC\\_003210](#)) and 10403S (GenBank accession no.: [NC\\_017544](#)) are *L. monocytogenes*;

29 <sup>b</sup>FC, fold change, FC= average NRC(CSS) ÷ average NRC(MBHIB); only genes with FDR <0.05 are listed;
